# Supplementary material for: Research on digital copyright protection based on the hyperledger fabric blockchain network technology
Source: PeerJ journal article supplement (doi:10.7717/peerj-cs.709), 2021-09-17
Supplement: Fig_S1.Docker_query_result.pdf [file Fig_S1.Docker_query_result.pdf]

[fabric@fabric-pc:~/go/src/github.com/hyperledger/fabric/aberic](https://github.com/hyperledger/fabric/aberic)\$ docker ps

| CONTAINER ID | IMAGE                      | COMMAND                | CREATED       | STATUS | PORTS                                              | NAMES                  |
|--------------|----------------------------|------------------------|---------------|--------|----------------------------------------------------|------------------------|
| 1f762b0036f0 | hyperledger/fabric-tools   | "/bin/bash"            | 4 minutes ago | Up     |                                                    | cli                    |
| 428e9c8de9e5 | hyperledger/fabric-peer    | "peer node start"      | 5 minutes ago | Up     | 0.0.0.0:7051-7053->7051-7053/tcp                   | peer0.org1.example.com |
| 5d0b820e34d9 | hyperledger/fabric-couchdb | "tini--/docker-ent..." | 5 minutes ago | Up     | 5 minutes 4369/tcp,9100/tcp,0.0.0.0:5984->5984/tcp | couchdb                |
| 592744861f52 | hyperledger/fabric-orderer | "orderer"              | 5 minutes ago | Up     | 5 minutes 0.0.0.0:7050->7050/tcp                   | orderer.example.com    |
