# Supplementary material for: Research on digital copyright protection based on the hyperledger fabric blockchain network technology
Source: PeerJ journal article supplement (doi:10.7717/peerj-cs.709), 2021-09-17
Supplement: Fig_S2.User_successfully_registered.pdf [file Fig_S2.User_successfully_registered.pdf]

2020-05-19 10:21:04.276 UTC [chaincodeCmd] chaincodeInvokeOrQuery -> INFO 077  
Chaincode invoke successful. Result: status:200  
2020-05-19 10:21:04.276 UTC [main] main ->INFO 078 Exiting.....
