# Supplementary material for: Research on digital copyright protection based on the hyperledger fabric blockchain network technology
Source: PeerJ journal article supplement (doi:10.7717/peerj-cs.709), 2021-09-17
Supplement: Fig_S7.Enter_a_user_ID_that_does_not_exist.pdf [file Fig_S7.Enter_a_user_ID_that_does_not_exist.pdf]

Error:Error endorsing invoke: rpc error: code=Unknown desc = chaincode error (status: 500, message: user not found) - <nil>
