# Supplementary material for: Research on digital copyright protection based on the hyperledger fabric blockchain network technology
Source: PeerJ journal article supplement (doi:10.7717/peerj-cs.709), 2021-09-17
Supplement: Fig_S12.Not_enough_parameters_entered.pdf [file Fig_S12.Not_enough_parameters_entered.pdf]

Error:Error endorsing invoke: rpc error: code=Unknown desc = chaincode error (status: 500, message: not enough args) - <nil>
