# Supplementary material for: Research on digital copyright protection based on the hyperledger fabric blockchain network technology
Source: PeerJ journal article supplement (doi:10.7717/peerj-cs.709), 2021-09-17
Supplement: Fig_S13.User_query_test.pdf [file Fig_S13.User_query_test.pdf]

Query Result: { "assets" : [ "2020520" , " 19980722" ], "id" : "522002" , "name" :  
"Lexie" }

2020-05-19 12:59:30.042 UTC [main] main -> INFO 008 Exiting.....
