# Supplementary material for: Research on digital copyright protection based on the hyperledger fabric blockchain network technology
Source: PeerJ journal article supplement (doi:10.7717/peerj-cs.709), 2021-09-17
Supplement: Fig_S14.Copyright_query_test.pdf [file Fig_S14.Copyright_query_test.pdf]

Query Result: { "id" : [ "19980722" ," metadata" : "1271319" ," name" :  
"Blooming" } }

2020-05-19 13:04:53.464 UTC [main] main -> INFO 008 Exiting.....
