# Supplementary material for: Research on digital copyright protection based on the hyperledger fabric blockchain network technology
Source: PeerJ journal article supplement (doi:10.7717/peerj-cs.709), 2021-09-17
Supplement: Fig_S15.Copyright_transaction_records_query_test.pdf [file Fig_S15.Copyright_transaction_records_query_test.pdf]

Query Result: [{"asset\_id": "19980722", "origin\_owner\_id": "522001", "current\_owner\_id": "522002"}, {"asset\_id": "19980722", "origin\_owner\_id": "originOwnerPlaceholder", "current\_owner\_id": "522001"}]
